# Supplementary material for: Cerium promotion on the hydrocarbon resistance of a Cu-SAPO-34 NH3-SCR monolith catalyst
Source: Royal Society of Chemistry journal article supplement (doi:10.1039/c5cy00704f), 2015-01-01
Supplement: c5cy00704f1.pdf [file c5cy00704f1.pdf]

SUPPLEMENTARY INFORMATION

**Cerium promotion on the hydrocarbons resistance of  
Cu-SAPO-34 NH<sub>3</sub>-SCR monolith catalyst**

Yi Cao<sup>1</sup>, Li Lan<sup>1</sup>, Xi Feng<sup>2</sup>, Zhengzheng Yang<sup>3</sup>, Sha Zou<sup>1</sup>, Haidi Xu<sup>1</sup>, Zheqi Li<sup>1</sup>,

Maochu Gong<sup>1</sup>, Yaoqiang Chen<sup>1, 2, 3, 4\*</sup>

1. Key Laboratory of Green Chemistry & Technology of the Ministry of Education, College of Chemistry, Sichuan University, Chengdu, 610064, PR China

2. College of Chemical Engineering, Sichuan University, Chengdu, 610064, PR China

3. College of Architecture and Environment, Sichuan University, Chengdu 610064, Sichuan, PR China

4. Sichuan Province Engineering Center of Environmental Catalytic Materials, Chengdu 610064, PR China

\* To whom corresponding authors should be addressed:

[nic7501@scu.edu.cn](mailto:nic7501@scu.edu.cn) (Yaoqiang Chen)

Tel. /Fax: +86 28 85418451

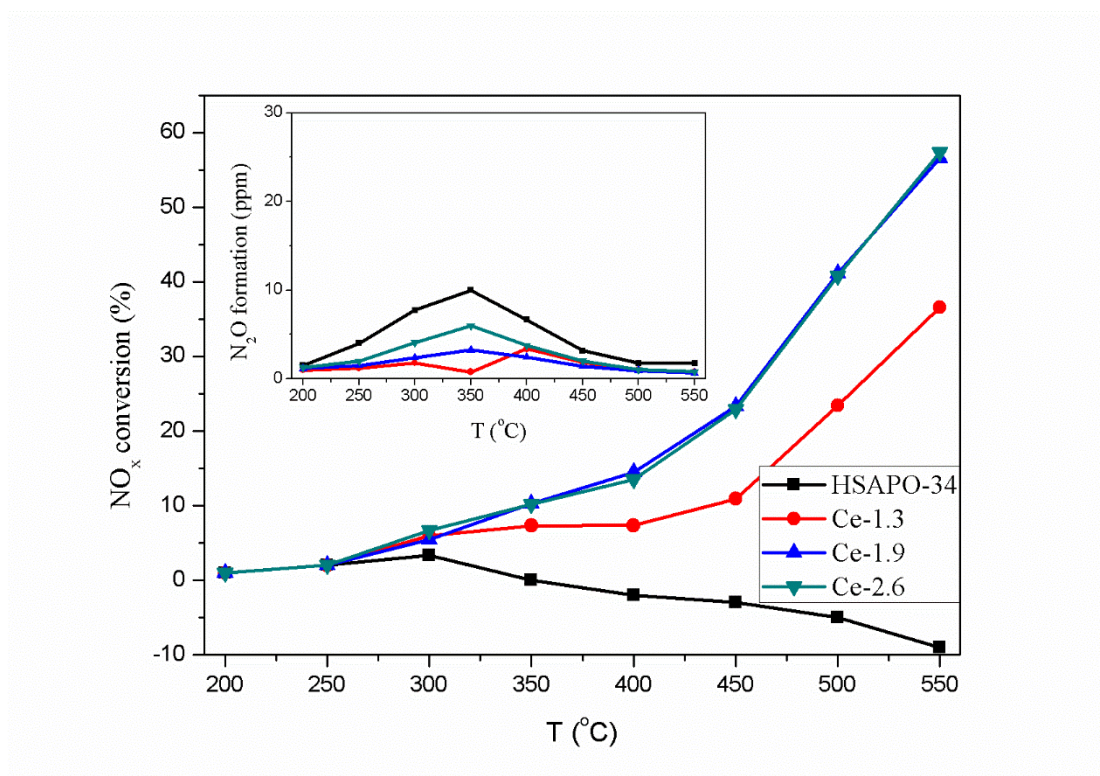

Fig. S1. The NO<sub>x</sub> conversion and N<sub>2</sub>O formation of the H-SAPO-34 and Ce-x supported material. Feed condition: 350 ppm NH<sub>3</sub>, 350 ppm NO, 8% O<sub>2</sub>, 5 vol% H<sub>2</sub>O and N<sub>2</sub> balance, GSHV: 30,000 h<sup>-1</sup>.

Table S1. The chemical composition of Ce-x.

| sample | Ce (wt%) | Si (wt%) | Al (wt%) | P (wt%) |
|--------|----------|----------|----------|---------|
| Ce-1.3 | 1.2      | 2.9      | 20.2     | 18.1    |
| Ce-1.9 | 1.9      | 3.1      | 19.5     | 17.5    |
| Ce-2.6 | 2.6      | 2.7      | 19.8     | 17.9    |

The NO<sub>x</sub> conversion of the H-SAPO-34 and Ce-x supported materials were shown in Fig. S1, and the chemical composition of Ce-x were listed in Table S1. For the

supported materials, it could be found that the H-SAPO-34 supported material showed no NH<sub>3</sub>-SCR activity, and the NO<sub>x</sub> conversion at temperature above 300 °C was negative. In addition, after the Ce doping, the Ce-x supported materials also showed little NH<sub>3</sub>-SCR activity at temperature below 300 °C, indicating that the cerium species was not the active sites for CuCe-x catalysts at the temperature below 300 °C. Furthermore, at the temperature above 300 °C, the NO<sub>x</sub> conversion of Ce-x catalysts increased with the content of Ce increasing, until the content of Ce reached 1.9 wt%, suggesting that the NO<sub>x</sub> conversion of CuCe-x catalysts may be improved by Ce adding. It could be found that the amount of N<sub>2</sub>O formation of Ce-x catalyst increased as the content of Ce increasing, and the maximum concentrations of N<sub>2</sub>O formation of Ce-x catalysts were not higher than 10 ppm, indicating that the selectivity of NO<sub>x</sub> to N<sub>2</sub> of Ce-x catalysts were high.
